# Supplementary material for: [Retracted] Handgrip Strength‐Related Factors Affecting Health Outcomes in Young Adults: Association with Cardiorespiratory Fitness
Source: Hindawi journal article supplement (doi:10.1155/2021/6645252), 2021-01-01
Supplement: f1 [file 6645252.f1.doc]

**Supplementary material 1**: STROBE Checklist for cross-sectional studies

|  | Item No | Recommendation | Reported  on page No |
| --- | --- | --- | --- |
| Title and abstract | 1 | (a) Indicate the study’s design with a commonly used term in the title or the abstract | Title page |
| (b) Provide in the abstract an informative and balanced summary of what was done and what was found | Abstract |
| Introduction | | |  |
| Background/rationale | 2 | Explain the scientific background and rationale for the investigation being reported | 1-2 |
| Objectives | 3 | State specific objectives, including any prespecified hypotheses | 2 |
| Methods | | |  |
| Study design | 4 | Present key elements of study design early in the paper | 2 |
| Setting | 5 | Describe the setting, locations, and relevant dates, including periods of recruitment, exposure, follow-up, and data collection | 2-3 |
| Participants | 6 | (a) Give the eligibility criteria, and the sources and methods of selection of participants | 2-3 |
| Variables | 7 | Clearly define all outcomes, exposures, predictors, potential confounders, and effect modifiers. Give diagnostic criteria, if applicable | 3 |
| Data sources/ measurement | 8* | For each variable of interest, give sources of data and details of methods of assessment (measurement). Describe comparability of assessment methods if there is more than one group | 3-5 |
| Bias | 9 | Describe any efforts to address potential sources of bias | 5 |
| Study size | 10 | Explain how the study size was arrived at | 2 |
| Quantitative variables | 11 | Explain how quantitative variables were handled in the analyses. If applicable, describe which groupings were chosen and why | 4-5 |
| Statistical methods | 12 | (a) Describe all statistical methods, including those used to control for confounding | 5-6 |
| (b) Describe any methods used to examine subgroups and interactions | 5-6 |
| (c) Explain how missing data were addressed | 5 |
| (d) If applicable, describe analytical methods taking account of sampling strategy | NA |
| (e) Describe any sensitivity analyses | 8,  Figure 3 |
| Results | | |  |
| Participants | 13* | (a) Report numbers of individuals at each stage of study—eg numbers potentially eligible, examined for eligibility, confirmed eligible, included in the study, completing follow-up, and analysed | 6,  Figure 1 |
| (b) Give reasons for non-participation at each stage | 6,  Figure 1 |
| (c) Consider use of a flow diagram | Figure 1 |
| Descriptive data | 14* | (a) Give characteristics of study participants (eg demographic, clinical, social) and information on exposures and potential confounders | 6,  Table 1 |
| (b) Indicate number of participants with missing data for each variable of interest | 6 |
| Outcome data | 15* | Report numbers of outcome events or summary measures | 6 |
| Main results | 16 | (a) Give unadjusted estimates and, if applicable, confounder-adjusted estimates and their precision (eg, 95% confidence interval). Make clear which confounders were adjusted for and why they were included | 7,  Table 2,  Table 3 |
| (b) Report category boundaries when continuous variables were categorized | 4-5 |
| (c) If relevant, consider translating estimates of relative risk into absolute risk for a meaningful time period | NA |
| Other analyses | 17 | Report other analyses done—eg analyses of subgroups and interactions, and sensitivity analyses | 8,  Figure 3 |
| Discussion | | |  |
| Key results | 18 | Summarise key results with reference to study objectives | 8 |
| Limitations | 19 | Discuss limitations of the study, taking into account sources of potential bias or imprecision. Discuss both direction and magnitude of any potential bias | 10 |
| Interpretation | 20 | Give a cautious overall interpretation of results considering objectives, limitations, multiplicity of analyses, results from similar studies, and other relevant evidence | 8-9 |
| Generalisability | 21 | Discuss the generalisability (external validity) of the study results | 10 |
| Other information | | |  |
| Funding | 22 | Give the source of funding and the role of the funders for the present study and, if applicable, for the original study on which the present article is based | 12 |

**Supplementary material 2**: Chinese ethical approval document


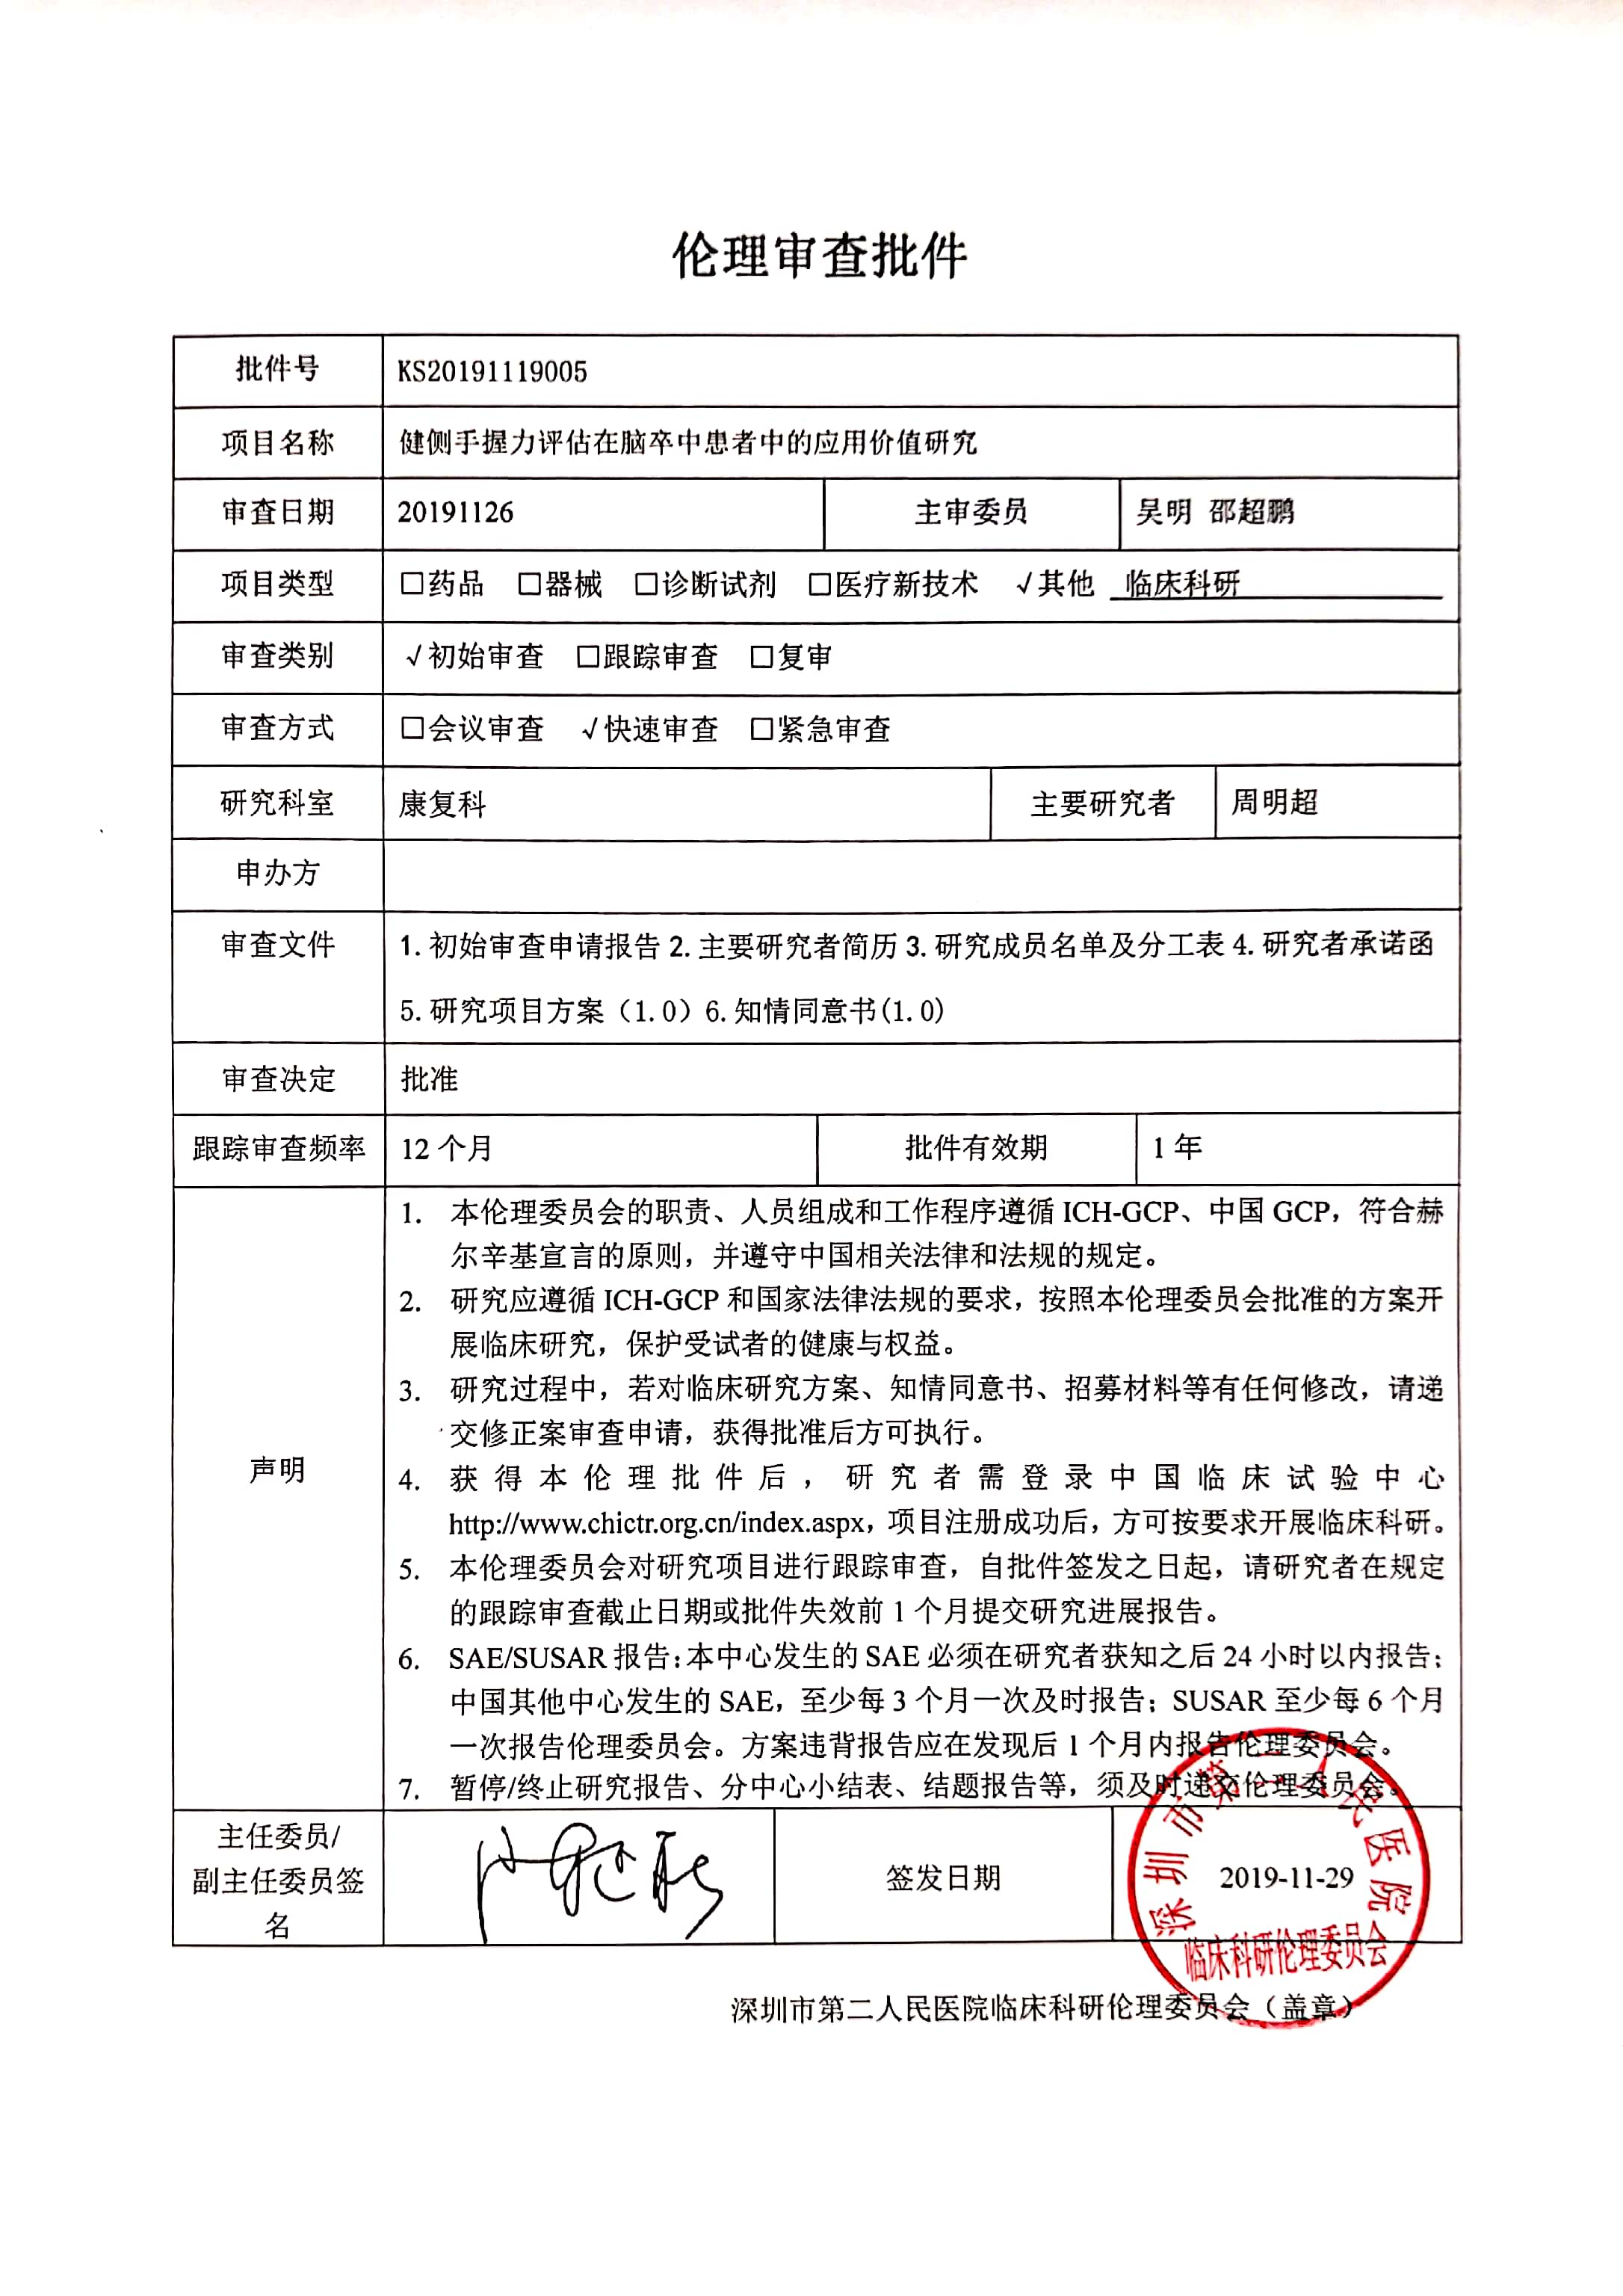


**Supplementary material 3**: English translation ethical approval document

| Ethical number | KS20191119005 | | |
| --- | --- | --- | --- |
| Project name | Study for the application value of grip strength on the unaffected side in patients with stroke | | |
| Ethical approval date | 2019-11-26 | Assessors | Dr. Ming Wu, Chaopeng Shao |
| Project type | Durg □ [instrument](javascript:;) □ Diagnostic reagent □ New medical technology  ☑others Clinical research | | |
| Review category | R Initial review □Tracking review £Retrial | | |
| Review mode | £Meeting review RQuick review □Emergency review | | |
| Research department | Rehabilitation department | Main researcher | Mingchao Zhou |
| Sponsor | Shenzhen Second People’s Hospital | | |
| Review document | 1.Initial application form; 2. Principal Researcher Information; 3. List of research members and division of labor; 4. Researcher Undertaking Letter; 5. Clinical study protocol (V1.0); 6. Informed consent (V1.0). | | |
| Review decision | Approve | | |
| Tracking review frequency | Twelve months | Validity period | 2020-11-26 |
| Statement | The duties, personal composition and working procedures of the ethics Committee are follow ICH-GCP and China GCP, conforming to the principles of Helsinki and comply with the relevant laws and regulation.  Research should follow ICH-GCP , national laws and regulations, carry out clinical research according to the program approved by the ethics committee, and protect the health and rights of subjects.  During the research, if there are any changes to the clinical research program, informed consent, recruitment materials, etc., please submit an application for amendment review, which can be implemented only after approval.  After obtaining this ethical approval, the researcher needs to log in to the China Clinical Laboratory Center http://www.chictr.org.cn/index.aspx to register before conducting research.  Ethics committee will follow up the research project from the date of issuance of the ethical review form, the researcher is requested to submit the research progress report within the specified tracking review deadline or one month before the approval expires.  6. SAE/SUSAR report: The SAE occurs in the center must be reported within 24 hours. SAE occurs in other parts of China is reported at least once every three months. SUSAR is reported at least every six months. If the plan violates the original design, reports within 1 month.  7. Suspension/termination of research reports, interim reports, and final reports should be submitted to the Ethics Committee timely. | | |
| Signature of Director/Deputy Director | Zhenggeng Chen | Date | 2019-11-29 |

Institutional Review Board of Shenzhen Second People’s Hospital(stamp)
